# Supplementary material
Source: publisher figshare collection journal article supplement (https://acs.figshare.com/ndownloader/files/26031531)
Supplement: Supplementary file 1 [file 26031531]

# Adding Value to Spruce Bark by the Isolation of Nanocellulose in a Biorefinery Concept

*Barbara Rietzler<sup>a</sup> and Monica Ek<sup>a,\*</sup>*

<sup>a</sup> KTH Royal Institute of Technology, School of Engineering Sciences in Chemistry,  
Biotechnology and Health (CBH), Fibre and Polymer Technology/WWSC,  
Teknikringen 56, SE-100 44 Stockholm, Sweden

\*Corresponding author: Monica Ek, [monicaek@kth.se](mailto:monicaek@kth.se)

Number of pages: 2

Number of figures: 1

Number of tables: 0

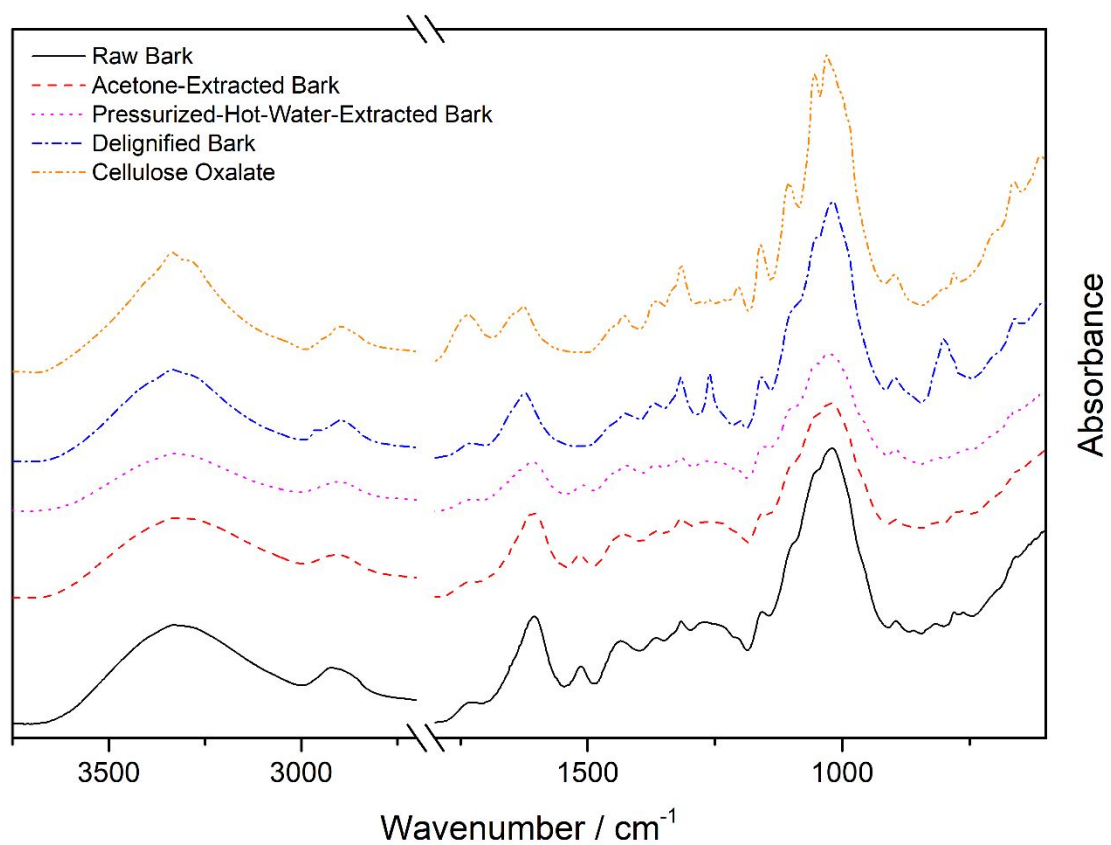

**Figure S1.** ATR-FTIR spectra of all samples after each processing step.
